# Supplementary material for: A New Monoterpene from the Leaves of a Radiation Mutant Cultivar of Perilla frutescens var. crispa with Inhibitory Activity on LPS-Induced NO Production
Source: PubMed Central journal article supplement (PMC6151837; doi:10.3390/molecules22091471), 2017-09-04
Supplement: molecules-22-01471-s001.pdf [file molecules-22-01471-s001.pdf]

**Supplementary Materials: A New Monoterpene from the Leaves of a Radiation Mutant Cultivar of *Perilla frutescens* var. *crispa* with Inhibitory Activity on LPS-Induced NO Production**

**Bomi Nam, Yangkang So, Hyo-Young Kim, Jin-Baek Kim, Chang Hyun Jin and Ah-Reum Han \***

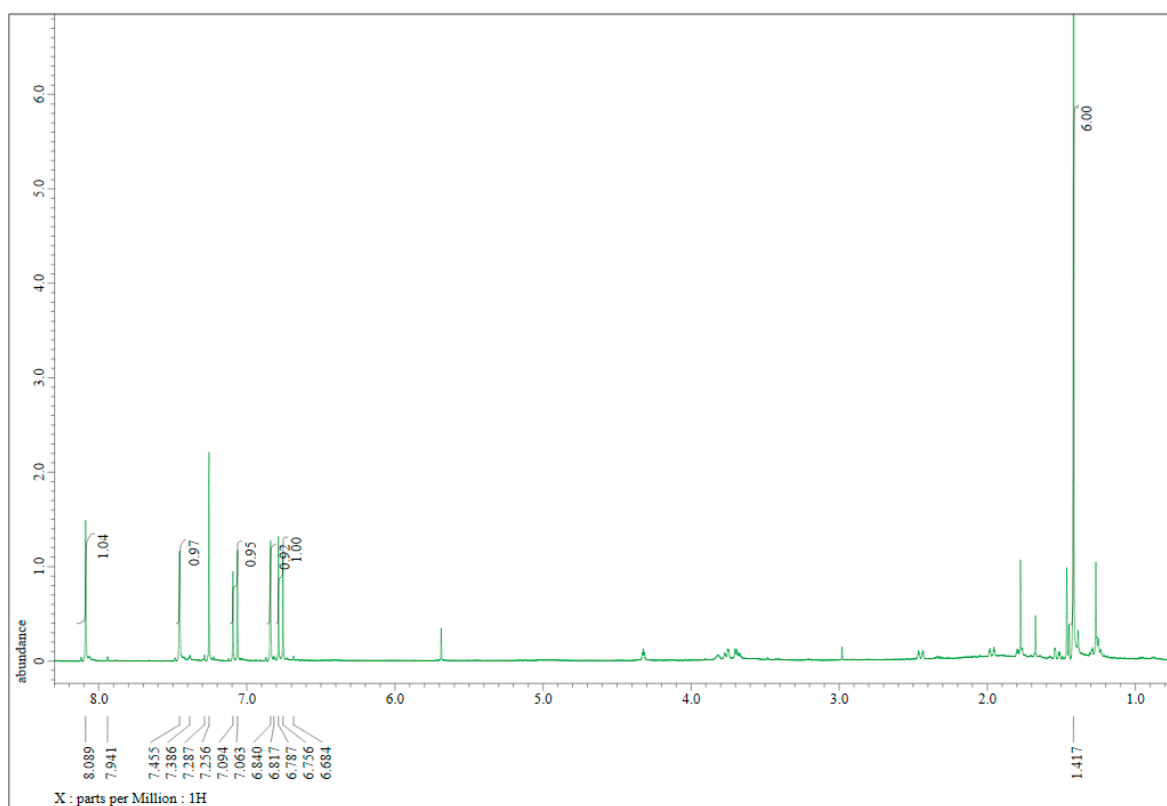

Figure S1. <sup>1</sup>H-NMR (500 MHz, CDCl<sub>3</sub>) spectrum of compound 1.

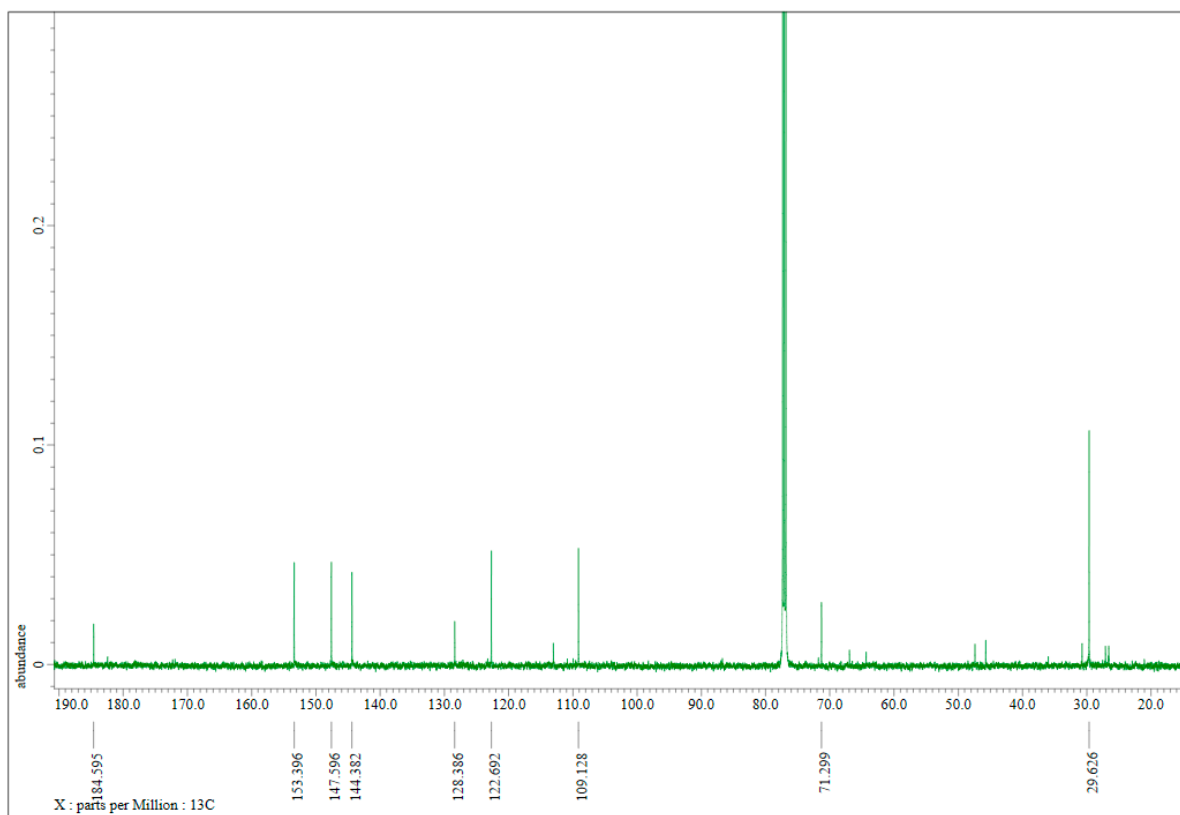

**Figure S2.**  $^{13}\text{C}$ -NMR (125 MHz,  $\text{CDCl}_3$ ) spectrum of compound 1.

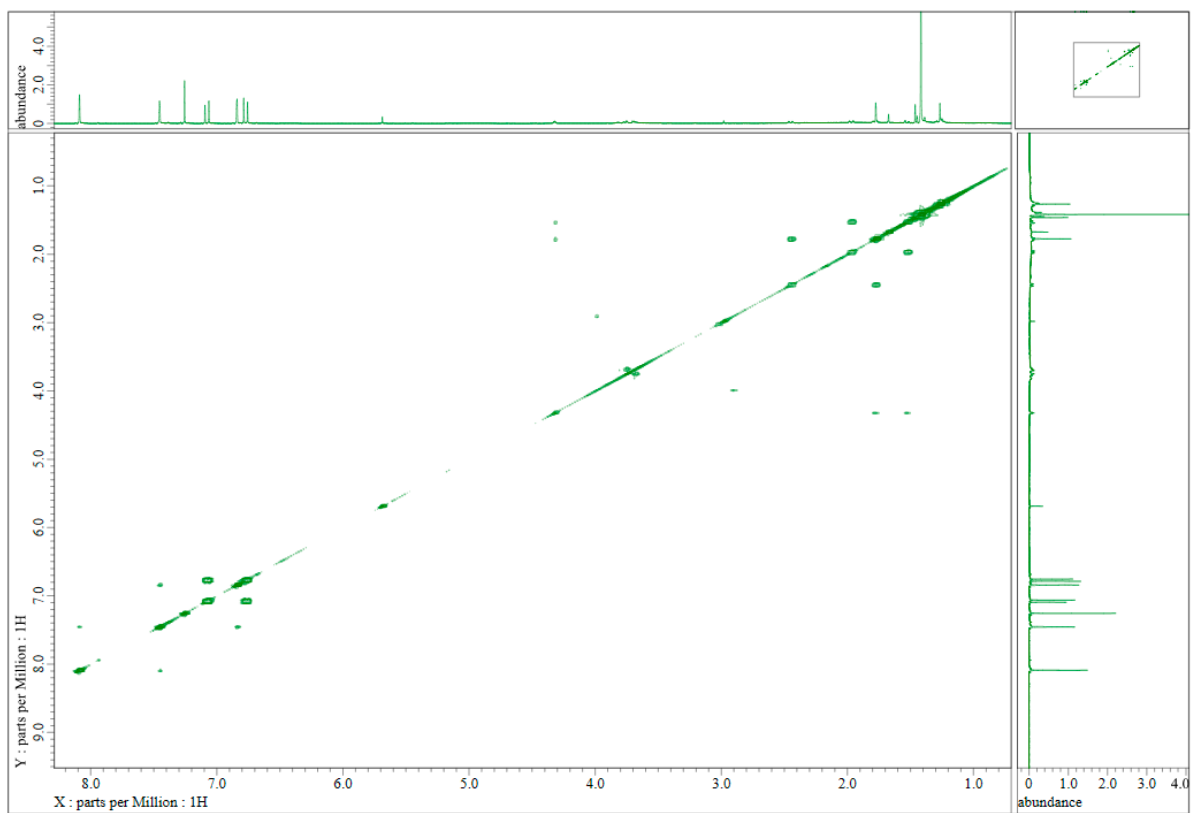

**Figure S3.**  $^1\text{H}$ - $^1\text{H}$  COSY NMR spectrum of compound **1**.

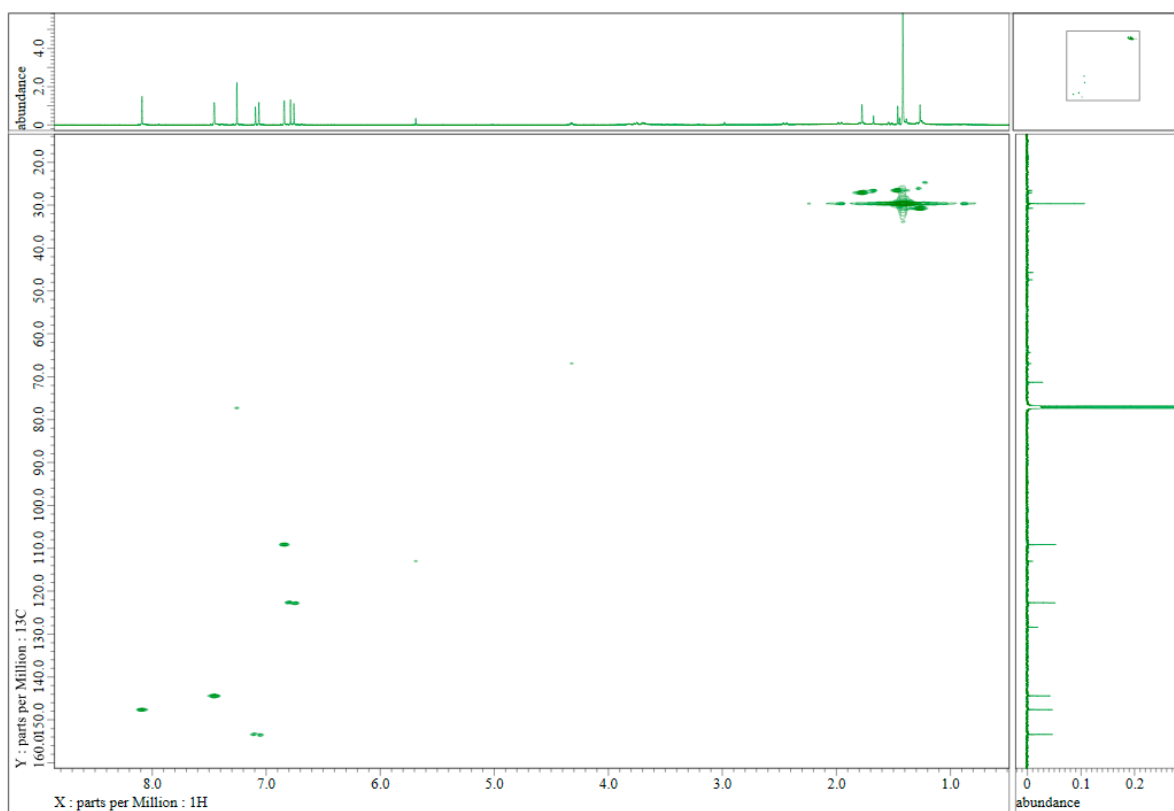

**Figure S4.**  $^1\text{H}$ - $^{13}\text{C}$  HMQC NMR spectrum of compound 1.

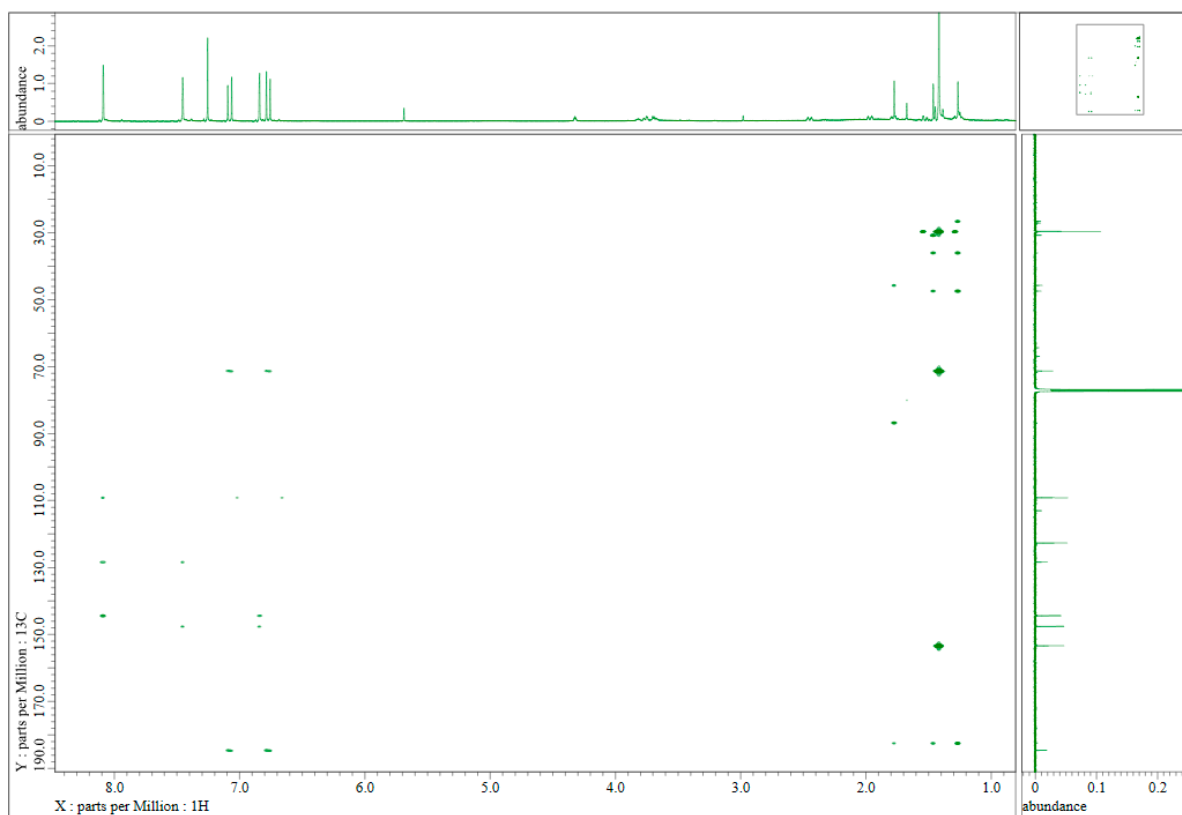

**Figure S5.**  $^1\text{H}$ - $^{13}\text{C}$  HMBC NMR spectrum of compound 1.
